# Supplementary material
Source: PubMed Central journal article supplement (PMC3080422)
Supplement: supp_110.090688_biolreprod.110.090688-1.pdf [file supp_110.090688_biolreprod.110.090688-1.pdf]

**Zhang et al., Supplemental Figure S1.** Cycle switch, two dimensional fluorescence difference gel electrophoresis (2D-DIGE) analysis of nitrosoproteins in normotensive and preeclamptic human placentas. As a supplement for Figure 4 and Table 1, black and white images shown fluorescent signals from the red and green channels of all three paired normotensive and preeclamptic human placentas are shown. The spots circled and numbered represents 46 nitrosoproteins as listed in Table 2. Ratios (preeclampsia/nomormal) in signal intensities for each spot were calculated for statistical analysis.

# Zhang et al., Supplemental Figure S1

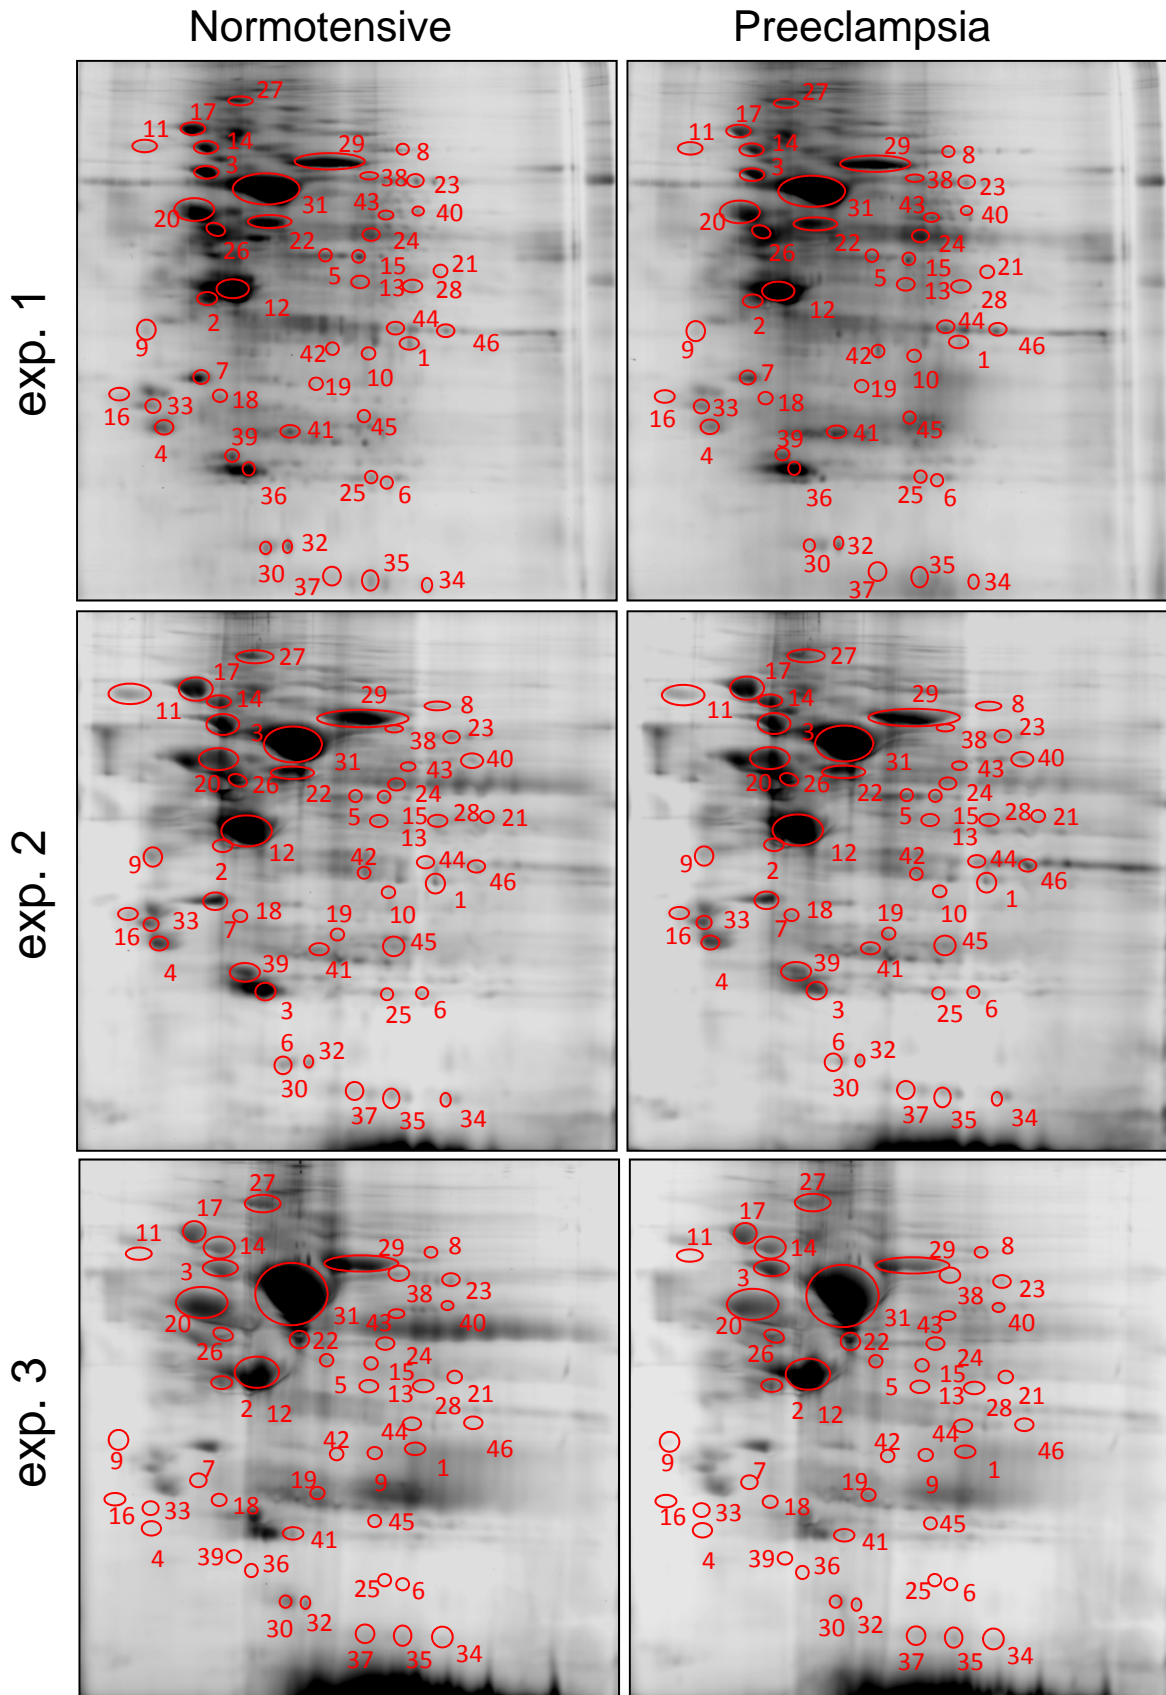

**Zhang et al., Supplemental Table S1: Matched Peptide list in protein identification via Matrix assisted laser desorption/ionization-time of flight (MALDI-TOF)/tandam mass spectrometry.**

| Spot #., Protein Name                                                   | # Pep Matched | Peptides Matched                                                                                                                                                                                                                                                                                                                                                                                                        |
|-------------------------------------------------------------------------|---------------|-------------------------------------------------------------------------------------------------------------------------------------------------------------------------------------------------------------------------------------------------------------------------------------------------------------------------------------------------------------------------------------------------------------------------|
| 1. annexin A2 (ANXA2)                                                   | 15            | WISIMTER<br>AYTNFDAER<br>QDIAFAYQR<br>TPAQYDASELK<br>TNQELQEINR<br>SLYYYIQQDTK<br>SYSPYDMLESIR<br>GVDEVTIVNILTNR<br>SALSGHLETVILGLLK<br>TDLEKDIISDTSGDFR<br>LSLEGDHSTPPSAYGSVK<br>AEDGSVIDYELIDQDAR<br>RAEDGSVIDYELIDQDAR<br>AYTNFDAERDALNIETAIK<br>ASMKGLGTDEDSLIEICSR                                                                                                                                                 |
| 2. keratin 19 (KRT19)                                                   | 26            | QNQEQYR<br>SEVTDLRR<br>FETEQALR<br>APSIHGGSGGR<br>IRDWYQK<br>VLDETLAR<br>IVLQIDNAR<br>ILGATIENSR<br>DAEAWFTSR<br>LTMQNLNDR<br>LEQEIATYR<br>MSVEADINGLR<br>KDAEAWFTSR<br>TKFETEQALR<br>NHEEEISTLR<br>SQYEVMAEQNR<br>MSVEADINGLRR<br>SRLEQEIATYR<br>AALEDTLAETEAR<br>EVAGHTEQLQMSR<br>QSSATSSFGLGGGSVR<br>DYSHYYTTIQDLR<br>TLQGLEIELQQLSMK<br>SLLEGQEDHYNNLSASK<br>TDLEMQIEGLKEELAYLK<br>FGAQLAHIQALISGIEAQLGDVR          |
| 3. heat shock 70kDa protein 5 (glucose-regulated protein, 78kDa)(HSPA5) | 25            | LTPEEIER<br>ALSSQHQAR<br>ITITNDQNR<br>VYGERPLTK<br>EFFNGKEPSR<br>VEIANDQGNR<br>DAGTIAGLNVMR<br>FEELNMDLFR<br>NELESYAYSLK<br>TWNDPSVQQDIK<br>SDIDEIVLVGGSTR<br>AKFEELNMDLFR<br>TFAPEEISAMVLT<br>ITPSYVAFTPEGER<br>KSDIDEIVLVGGSTR<br>TKPYIQVDIGGGQTK<br>NQLTSPENTVFDK<br>IINEPTAAAIYGLDKR<br>SQIFSTASDNQPTVTIK<br>VTHAVVTVPAYFNDAQR<br>DNHLLGTFDLTGIPPAPR<br>IEWLQSHQADIEDFK<br>GVPQIEVTFEIDVNGILR<br>KVTHAVVTVPAYFNDAQR |

|                                                                                                     |    |                                                                                                                                                                                                                                                                                     |
|-----------------------------------------------------------------------------------------------------|----|-------------------------------------------------------------------------------------------------------------------------------------------------------------------------------------------------------------------------------------------------------------------------------------|
|                                                                                                     |    | IEIESFYEGEDFSETLTR                                                                                                                                                                                                                                                                  |
| 4. tyrosine 3-monooxygenase/tryptophan 5-monooxygenase activation protein, zeta polypeptide (YWHAZ) | 14 | MKGDYYR<br>EKIETELR<br>YDDMAACMK<br>EMQPTHPIR<br>DSTLIMQLLR<br>KEMQPTHPIR<br>YLAEVAAGDDKK<br>FLIPNASQAESK<br>DICNDVLSLLEK<br>VVSSIEQKTEGAEK<br>SVTEQGAELSNEER<br>GIVDQSQQAYQEAFEISK<br>TAFDEAIAELDTLSEESYK<br>GIVDQSQQAYQEAFEISKK                                                   |
| 5. GDP dissociation inhibitor 2 (GDI2)                                                              | 13 | TTMRDVYK<br>VICILSHPIK<br>MLLYTEVTR<br>IPGSPPEMGR<br>LYSESLARYGK<br>GRDWNVDLIPK<br>DLGTESQIFISR<br>FKIPGSPPEMGR<br>MTGSEFDFEEMKR<br>FLVYVANFDEKDPR<br>EIRPALELLEPIEQK<br>SPYLYPLYGLGELPQGFAR<br>FDLGQDVIDFTGHALALYR                                                                 |
| 6. peroxiredoxin 1 (PRDX1)                                                                          | 9  | IGHPAPNFK<br>TIAQDYGVLK<br>DISLSDYKGG<br>ATAVMPDGQFK<br>LVQAFQFTDK<br>QITVNDLPVGR<br>QGGLGPMNIPLVSDPK<br>KQGGLGPMNIPLVSDPK<br>QGGLGPMNIPLVSDPKR                                                                                                                                     |
| 7. annexin A5 (ANXA5)                                                                               | 17 | FITIFGTR<br>VLTEIIASR<br>LYDAYELK<br>SEIDLFNIR<br>LIVALMKPSR<br>GAGTDDHTLIR<br>MLVVLLQANR<br>NFATSLYSMIK<br>GTVTDFPGFDER<br>KNFATSLYSMIK<br>DLLDDLKSELTGK<br>ETSGNLEQLLAVVK<br>GLGTDEESILTLTISR<br>SIPAYLAETLYAMK<br>WGTDEEKFITIFGTR<br>YMTISGFQIETIDR<br>DPDAGIDEAQVEQDAQALFQAGELK |
| 8. aconitase 2, mitochondrial(ACO2)                                                                 | 16 | EGWPLDIR<br>NTIVTSYNR<br>LNRPLTSEK<br>LTGSLSGWSSPK<br>RLNRPLTSEK<br>VAEKEGWPLDIR<br>SQFTITPGSEQIR<br>FRLEAPDADELPK<br>LQLLEPFDKWDGK<br>DSSGQHVDVSPTSQR<br>NAVVTQEFPGVPDTAR<br>WVVGIDENYEGSSR<br>IVYGHLDPPASQEIER<br>DLGGIVLANACGPCIGQWDR<br>VAMQDATAQMAMLQFISSGLSK                  |

|                                                                             |    |                                                                                                                                                                                                                                                                  |
|-----------------------------------------------------------------------------|----|------------------------------------------------------------------------------------------------------------------------------------------------------------------------------------------------------------------------------------------------------------------|
|                                                                             |    | VAMSHFEPNEYIHYDLLEK                                                                                                                                                                                                                                              |
| 9. tropomyosin 2 (beta) (TPM2)                                              | 16 | LDKENAIDR<br>MELQEMQLK<br>LVILEGELER<br>IQLVEEELDR<br>KLVILEGELER<br>ATDAEADVASLNR<br>QLEEEQQALQK<br>RIQLVEEELDR<br>TIDDLEETLASAK<br>KATDAEADVASLNR<br>QLEEEQQALQKK<br>ATDAEADVASLNR<br>GTEDEVEKYSESVK<br>LVILEGELERSEER<br>IQLVEEELDRAQER<br>EENVEIHQTLDQTLLELN |
| 10. Voltage-dependent anion channel 2 (VDAC2)                               | 6  | NNFAVGYR<br>LTLALVDGK<br>YQLDPTASISAK<br>LTFDITTFSPNTGK<br>VNNSLIGVGYTQTLRPGVK<br>TGFDFLHTNVNDGTEFGGSYQK                                                                                                                                                         |
| 11. protein kinase C substrate 80K-H (PRKCSH)                               | 16 | LIELQAGKK<br>NKFEEAER<br>LWEEQLAAAK<br>SLKDMESIR<br>SLEDQVEMLR<br>ESLQQMAEVTR<br>EEAEKPEREK<br>TVKEEAERPER<br>ETMVTSTTEPSR<br>KSLEDQVEMLR<br>AQEQELAADAFK<br>YEQGTGCWQGNR<br>ERESLQQMAEVTR<br>SEALPTDLPAPSAPDLTEPK<br>LGGSPSTLGTWGSWIGPDHDK<br>MPPYDEQTFADAAQEAR |
| 12. actin, beta (ACTB)                                                      | 10 | AGFAGDDAPR<br>GYSFTTAAER<br>AVFPSIVGRPR<br>IWHHTFYNELR<br>SYELPDGQVITIGNER<br>VAPEEHPVLLTEAPLNPK<br>DLYANTVLSGGTMMYPGIADR<br>KDLYANTVLSGGTMMYPGIADR<br>KYSVWIGGSILASLSTFQQMWISK<br>TTGIVMDSGDGVTHTVPIYEGYALPHAILR                                                |
| 13. tu translation elongation factor, mitochondrial (TUFM)                  | 10 | GTVVTGTLER<br>AEAGDNLGALVR<br>TVVTGIEMFHK<br>AEAGDNLGALVRGLK<br>KYEEIDNAPEER<br>LLDAVDYIPVPAR<br>GITINAAHVEYSTAAR<br>DKPHVNVGTIGHVDHGK<br>ADAVQDSEMVELVELEIR<br>DLEKPFLLPEAVYSVPGR                                                                               |
| 14. Heat shock protein 90kDa alpha (cytosolic), class A member 1 (HSP90AA1) | 24 | FYEQFSK<br>TDTGPEMGR<br>APFDLFENR<br>FENLCKIMK<br>YIDQEELNK<br>LGIHEDSQNR<br>HIYYITGETK<br>DQVANSFVER<br>APFDLFENRK<br>TDTGPEMGRGTK                                                                                                                              |

|                                                              |    |                                                                                                                                                                                                                                                                                           |
|--------------------------------------------------------------|----|-------------------------------------------------------------------------------------------------------------------------------------------------------------------------------------------------------------------------------------------------------------------------------------------|
|                                                              |    | RAPFDLFENR<br>LGIHEDSQNRK<br>EDQTEYLEER<br>DNSTMGYMAAKK<br>HFSVEGQLEFR<br>GVVDEDLPLNISR<br>SLTNDWEDHLAVK<br>ELHINLIPNKQDR<br>HSQFIGYPITLFVEK<br>HLEINPDHSIETLR<br>NPDDITNEEYGEFYK<br>KHLEINPDHSIETLR<br>VILHLKEDQTEYLEER<br>HNDDEQYAWESSAGGSFTVR                                          |
| 15. enolase 1, (alpha)(ENO1)                                 | 10 | IGAEVYHNLK<br>GNPTVEVDLFTSK<br>YISPDQLADLYK<br>LAQANGWGMVSHR<br>VVIGMDVAASEFFR<br>AAVPSGASTGIYEALER<br>LAMQEFMILPVGAANFR<br>DATNVGDEGGFAPNILENK<br>FTASAGIQVVGDDLTVTNPK<br>DYPVVSIEDPFDDWGAWQK                                                                                            |
| 16. clathrin, light chain (CLTB)                             | 9  | VTEQEW R<br>LTQEPESIR<br>DLEEWNR<br>RLQELDAASK<br>VAQLCDFNPK<br>LTQEPESIRK<br>EETPGTEWEK<br>KDLEEWNR<br>ESKEETPGTEWEK                                                                                                                                                                     |
| 17. heat shock protein 90kDa beta (Grp94), member 1(HSP90B1) | 17 | KTFEINPR<br>GLFDEYGSK<br>IYFMAGSSR<br>FAFQAEVNR<br>LGVIEDHSNR<br>EAESSPFVER<br>SILFVPTSAPR<br>KEAESSPFVER<br>EFEPLLWMMK<br>GVVSDDLLPLNVS R<br>NLLHVTD TGVMTR<br>VFITDDFHDMMPK<br>RVFITDDFHDMMPK<br>EEEAIQLDGLNASQIR<br>FQSSHPTDITSLDQYVER<br>ESDDPMAYIHFTAEGEVTFK<br>TVWDWELMNDIKPIWQRPSK |
| 18. chloride intracellular channel 1 (CLIC1)                 | 7  | YLSNAYAR<br>GFTIPEAFR<br>IGNCPFSQR<br>GVTFNVTTVDTK<br>NSNPALNDNLEK<br>LAALNPESNTAGLDIFAK<br>VLDNYLTSPLPEEVDETSAEDEGVSR                                                                                                                                                                    |
| 19. enoyl Coenzyme A hydratase 1, peroxisomal (ECH1)         | 6  | YQETFNVIER<br>GDDVARISWYLR<br>HVLHVQLNRPNK<br>EVDVGLAADVGTLQR<br>EVMLDAALALAAEISSK<br>VIGNQSLVNELAFTAR                                                                                                                                                                                    |
| 20. prolyl 4-hydroxylase, beta polypeptide (P4HB)            | 19 | ILEFFGLK<br>QLAPIWDK<br>ENLLDFIK<br>LKAEGSEIR<br>TVIDYNGER<br>THILLFLPK<br>SNFAEALAAHK                                                                                                                                                                                                    |

|                                                              |    |                                                                                                                                                                                                                                                                                                              |
|--------------------------------------------------------------|----|--------------------------------------------------------------------------------------------------------------------------------------------------------------------------------------------------------------------------------------------------------------------------------------------------------------|
|                                                              |    | EADDIVNWLK<br>NFEDVAFDEK<br>KSNFAEALAAHK<br>NFEDVAFDEKK<br>YQLDKDGVVLFK<br>YKPESEELTAER<br>FDEGRNFEGEVTK<br>LGETYKDHENIVIAK<br>VDATEESDLAQQYGVV<br>ILFIFIDSDHTDNQR<br>HNQLPLVIEFTEQTAPK<br>QFLQAAEAIDDPFGITSNSDVFSK                                                                                          |
| 21. isocitrate dehydrogenase 2 (NADP+), mitochondrial (IDH2) | 13 | IIWQFIK<br>HAHGDQYK<br>NILGGTVFR<br>WPLYMSTK<br>LDGNQDLIR<br>YFDLGLPNR<br>GKLDGNQDLIR<br>TIEEAAHGTVTR<br>LVPGWTKPITIGR<br>VAKPVVEMDGDDEMTR<br>LNEHFLNTTDFLDTIK<br>LIDDMVAQVLKSSGGFVWACK<br>ASGSRPAWAPAALTAPTSEQQPR                                                                                           |
| 22. protein disulfide isomerase family A, member 3 (PDIA3)   | 17 | FLQDYFDGNLK<br>FLQDYFDGNLKR<br>QAGPASVPLR<br>YGVSGYPTLK<br>FVMQEEFSR<br>LAPEYEAATR<br>DGEEAGAYDGPR<br>GFPTIYFSPANK<br>RLAPEYEAATR<br>ELSDFISYLQR<br>EATNPPVIQEEKPK<br>DLLIAYYDVYK<br>MDATANDVPSPEYVR<br>VVVAENFDEIVNNENK<br>DASIVGFFDSSFSEAHSEFLK<br>TFSHELSDFGLESTAGEIPVVAIR<br>KTFSELSDFGLESTAGEIPVVAIR    |
| 23. transketolase (TKT)                                      | 15 | HQPTAIIAK<br>ESWHGKPLPK<br>NSTFSEIFKK<br>ISSDLDGHPVPK<br>LDNLVAILDINR<br>KISSDLDGHPVPK<br>VLDPFITKPLDR<br>TVPCSTFAAFFTR<br>SVPTSTVFYPSDGVATEK<br>GITGVEDKESWHGKPLPK<br>ILATPPQEDAPSVDIANIR<br>LGQSDPAPLQHQMDIYQK<br>TSRPENAIYNNNEDFQVGQAK<br>SKDDQVTVIGAGVTLHEALAAELLK<br>ILTVEDHYEGGIGEAUVSSAVVGEPIVTHLAVNR |
| 24. glutamate dehydrogenase 1 (GLUD1)                        | 10 | YNLGLDLR<br>MVEGFFDR<br>NLNHVSYGR<br>VYNEAGVTFT<br>DDGSWEVIEGYR<br>DIVHSGLAYTMER<br>GGIRYSTDVSVEVK<br>HGGTIPIVPTAEFQDR<br>DSNYHLLMSVQESLER<br>KGFIPGIDVPAPDMSTGER                                                                                                                                            |
| 25. peroxiredoxin 1 (PRDX1)                                  | 7  | IGHPAPNFK<br>TIAQDYGVLK<br>DISLSDYKGGK                                                                                                                                                                                                                                                                       |

|                                      |    |                                                                                                                                                                                                                                                                                                                                                                                                                                                                     |
|--------------------------------------|----|---------------------------------------------------------------------------------------------------------------------------------------------------------------------------------------------------------------------------------------------------------------------------------------------------------------------------------------------------------------------------------------------------------------------------------------------------------------------|
|                                      |    | <p>ATAVMPDQGFK<br/> LVQAFQFTDK<br/> QITVNDLPVGR<br/> KQGGLGPMNIPLVSDPK</p>                                                                                                                                                                                                                                                                                                                                                                                          |
| 26. vimentin (VIM)                   | 25 | <p>LQEMLQR<br/> QVDQLTNDK<br/> QESTEYRR<br/> DNLAEDIMR<br/> QDVNDASLAR<br/> FADLSEAANR<br/> VELQELNDR<br/> ILLAELEQLK<br/> LGDLYEEEMR<br/> MALDIEIATYR<br/> EKLQEEMLQR<br/> NLQEAEEWYK<br/> EEAENTLQSFYR<br/> SLYASSPGGVYATR<br/> MALDIEIATYRK<br/> HLREYQDLLNVK<br/> VESLQEEIAFLKK<br/> ISLPLPNFSSLNLR<br/> TNEKVELQELNDR<br/> RMFGGPGTASRPSSSR<br/> VEVERDNLAEDIMR<br/> LQDEIQNMKEEMAR<br/> DGQVINETSQHDDLE<br/> LLQDSVDFSLADAINTEFK<br/> EMEENFAVEAANYQDTIGR</p> |
| 27. hypoxia up-regulated 1 (HYOU1)   | 20 | <p>RPLKNDEL<br/> MGPPYQPK<br/> YFQHLLGK<br/> KYPDYESK<br/> LAGLFNEQR<br/> TLGGLEMELR<br/> FTKPRPRPK<br/> VPRVQEVLLK<br/> EAGMQPQLQIR<br/> DIEAKMMALDR<br/> QADNPHVALYQAR<br/> FPEHELTFDPQR<br/> DAVVYPILVEFTR<br/> AHFNLDSEGVLSLDR<br/> DAVITVPVFFNQAER<br/> LYQPEYQEVSTEEQR<br/> NINADEAAAAMGAVYQAAALSK<br/> VLQLINDNTATALSYGVFR<br/> YSHDFNFHINYGDLGFLGPEDLR<br/> SLAEDFAEQPIKDAVITVPVFFNQAER</p>                                                                 |
| 28. phosphoglycerate kinase 1 (PGK1) | 10 | <p>NNQITNNQR<br/> FHVEEGK GK<br/> NNQITNNQRIK<br/> AHSSMVGVNLPQK<br/> LGDVYVNDAFGTAHR<br/> VSHVSTGGGASLELLEGK<br/> ACANPAAGSVILLENLR<br/> ITLPVDFVTADKFDENAK<br/> SVVLMShLGRPDGVPMPDK<br/> QIVWNGPVGVEWEAFAR</p>                                                                                                                                                                                                                                                    |
| 29. transferrin (TF)                 | 21 | <p>APNHAVVTR<br/> ASYLDCIR<br/> YLGEYVK<br/> KSCHTAVGR<br/> KASYLDCIR<br/> WCALSHHER<br/> DSGFQMNQLR<br/> SASDLTWDNLK<br/> EGYYGTGAFR<br/> DYELLCLDGTR<br/> MYLGYEYVTAIR</p>                                                                                                                                                                                                                                                                                        |



|                                                                |    |                                                                                                                                                                                                                                                                                                                                                                                                   |
|----------------------------------------------------------------|----|---------------------------------------------------------------------------------------------------------------------------------------------------------------------------------------------------------------------------------------------------------------------------------------------------------------------------------------------------------------------------------------------------|
|                                                                |    | SKEFQLFSSPHGK<br>CSTSSLLEACTFR<br>KPVVEYANCHLAR<br>EDPQTFYYAVAVVK<br>KCSTSSLLEACTFR<br>DCHLAQVPSHTVVAR<br>WCAVSEHEATKCQSFR<br>NLNEKDYELLCLDGTR<br>SAGWNIPIGILLYCDLPEPR<br>KPVDEYKDCHLAQVPSHTVVAR                                                                                                                                                                                                  |
| 30. transgelin 2(TAGLN2)                                       | 8  | DVGRPQPGR<br>IQASTMAFK<br>EVQQKIEK<br>ENFQNWLK<br>TLMNGLGLAVAR<br>NFSNDQLQEGK<br>DDGLFSGDPNWFPK<br>QMEQISQFLQAAER                                                                                                                                                                                                                                                                                 |
| 31. albumin (ALB)                                              | 22 | FQNALLVR<br>KLYEIAI<br>LDELREDEGK<br>CCTESLVNR<br>DAHKSEVAHR<br>HPDYSVLLLLR<br>RHPDYSVLLLLR<br>CCAAADPHECYAK<br>DVFLGMFLYEYAR<br>ETCFAEPTMRIR<br>DVFLGMFLYEYAR<br>QNCELFEQLGEYK<br>QEPERNECFQHK<br>ADDKETCFAEPTMR<br>HPYFYAPELFFAK<br>RPCFSALEVDETYVPK<br>VFDEFKPLVEEPQNLK<br>VHTECCHGDLLCADDR<br>EFNAETFTFHADICTLSEK<br>TYETTLEKCCAAADPHECYAK<br>VHTECCHGDLLCADDRADLAK<br>LVRPEVDVMCTAFHDNEETFLK |
| 32. superoxide dismutase 1, soluble (SOD1)                     | 4  | LACGVIGIAZ<br>HGGPKBZER<br>HVGDLGNVTADK<br>GLTEGLHGFHVHEFGDNTAGCTSAGPHFBPLSR                                                                                                                                                                                                                                                                                                                      |
| 33. family with sequence similarity 82, member B (FAM82B)      | 6  | LAAFWLMKAK<br>ALEKNESSFASHK<br>IANAYIIKEHFEK<br>LPAGTSGSRGHCGPCR<br>WYAICLSDVGDYEGIKAK<br>DATSIHLMGIWCYTFEAEMPWYQR                                                                                                                                                                                                                                                                                |
| 34. peptidylprolyl isomerase A (cyclophilin A)(PPIA)           | 9  | VSFELFADK<br>FEDENFILK<br>EGMNIVEAMER<br>GFGYKGSCFHR<br>VSFELFADKVPK<br>VKEGMNIVEAMER<br>IIPGFMCQGGDFTR<br>SIYGEKFEDENFILK<br>VNPTVFFDIAVDGEPLGR                                                                                                                                                                                                                                                  |
| 35. peptidylprolyl isomerase A (cyclophilin A)(PPIA)           | 8  | VSFELFADK<br>FEDENFILK<br>EGMNIVEAMER<br>GFGYKGSCFHR<br>VKEGMNIVEAMER<br>IIPGFMCQGGDFTR<br>SIYGEKFEDENFILK<br>VNPTVFFDIAVDGEPLGR                                                                                                                                                                                                                                                                  |
| 36. chorionic somatomammotropin hormone 1 (placental lactogen) | 10 | NYGLLYCFR<br>DMDKVETFLR<br>LFDHAMLQAHR                                                                                                                                                                                                                                                                                                                                                            |

|                                                      |    |                                                                                                                                                                                                                                                                                                                   |
|------------------------------------------------------|----|-------------------------------------------------------------------------------------------------------------------------------------------------------------------------------------------------------------------------------------------------------------------------------------------------------------------|
| (CSH1)                                               |    | DLQEGITLMGR<br>VETFLRMVQCR<br>FDTNSHNDALK<br>ISLLIESWLEPVR<br>AHQLAIDTYQEFETYIPK<br>SMFANNLVYDTSDDYHLLK<br>YSFLHDSQTSFCFSDSIPTSPNMEETQQK                                                                                                                                                                          |
| 37. peptidylprolyl isomerase A (cyclophilin A)(PPIA) | 8  | VSFELFADK<br>FEDENFILK<br>EGMNIVEAMER<br>VSFELFADKVPK<br>VKEGMNIVEAMER<br>IIPGFMCQGGDFTR<br>SIYGEKFEDENFILK<br>VNPTVFFDIAVDGEPLGR                                                                                                                                                                                 |
| 38. calpain 6 (CAPN6)                                | 10 | YTELVEEK<br>NVNNPIFGR<br>MSCWNLAR<br>NFHKLNVCR<br>IFSEVPVQLR<br>GHYTMDIR<br>LHHLYQER<br>FRLHHLYQER<br>GNYVLVPTMFQHGR<br>TTDIIIVQVWNSR                                                                                                                                                                             |
| 39. apolipoprotein A-I (APOA1)                       | 17 | AKPAEDLR<br>LSPLGEEMR<br>ATEHLSTLSEK<br>QGLLPVLEFK<br>DLATVYVDVLK<br>VQPYLDDFQK<br>WQEEMELYS<br>THLAPYSDEL<br>QEMSKDLEEVK<br>VSFLSALEEYTK<br>DYVSQFEGSALGK<br>KWQEEMELYS<br>VKDLATVYVDVLK<br>LLDNWDSVTSTFSK<br>EQLGPVTQEFWDNLEK<br>LREQLPVTQEFWDNLEK<br>EQLGPVTQEFWDNLEKETGLR                                     |
| 40. pyruvate kinase, muscle (PKM2)                   | 15 |                                                                                                                                                                                                                                                                                                                   |
| 41. heat shock 27kDa protein 1 (HSPB1)               | 8  | DWYPHSR<br>GPSWDPFR<br>QLSSGVSEIR<br>QDEHGYISR<br>LFDQAFGLPR<br>VSLDVNHFADELTVK<br>GPSWDPFRDWYPHSR<br>LATQSNEITIPVTFESR                                                                                                                                                                                           |
| 42. annexin A2 (ANXA2)                               | 19 | WISIMTER<br>AYTNFDAER<br>QDIAFAYQR<br>TPAQYDASELK<br>DIISDTSGDFR<br>TNQELQEINR<br>DIISDTSGDFRK<br>SLYYYIQQDTK<br>SYSPYDMLISIR<br>GVDEVTIVNILTNR<br>YSPYDMLISIRK<br>TKGVDEVTIVNILTNR<br>GLGTDEDSLIEIICSR<br>TDLEKDIISDTSGDFR<br>LSLEGDHSTPPSAYGSVK<br>AEDGVIDYELIDQDAR<br>RAEDGVIDYELIDQDAR<br>AYTNFDAERDALNIETAIK |

|                                                      |    |                                                                                                                                                                                                                                          |
|------------------------------------------------------|----|------------------------------------------------------------------------------------------------------------------------------------------------------------------------------------------------------------------------------------------|
|                                                      |    | ASMKGLGTDEDSLIEICSR                                                                                                                                                                                                                      |
| 43. catalase (CAT)                                   | 13 | LNVITVGPR<br>LFAYPDTHR<br>LSQEDPDYGR<br>DPASDQMQRHWK<br>AFYVNVLNNEQR<br>FNTANDDNVTQVR<br>DPILFPSFIHSQK<br>NAIHTFVQSGSHLAAR<br>GAGAFGYFEVTHDITK<br>LGPNYLHIPVNCYPYR<br>FSTVAGESGSADTVRDRP<br>GPLLVQDVVFTDEMAHFDR<br>FYTEDGNWDLVGNNTPIFFIR |
| 44. annexin A2 (ANXA2)                               | 13 | WISIMTER<br>AYTNFDAER<br>QDIAFAYQR<br>TNQELQEINR<br>SLYYYIQQDTK<br>SYSPYDMLESIR<br>GVDEVTIVNILTNR<br>TDLEKDIISDTSGDFR<br>LSLEGDHSTPPSAYGSVK<br>AEDGSVIDYELIDQDAR<br>RAEDGSVIDYELIDQDAR<br>AYTNFDAERDALNIETAIK<br>ASMKGLGTDEDSLIEICSR     |
| 45. carbonic anhydrase I (CA1)                       | 10 | VLDALQAIK<br>GGPFSDSYR<br>ADGLAVIGVLMK<br>ESISVSSEQLAQFR<br>YSAELHVAHWNSAK<br>LYPIANGNNQSPVDIK<br>HDTSLKPISVSNPATAK<br>MASPDWGYDDKNGPEQWSK<br>EIINVGHSHFVNFEDNDNR<br>SLLSNVEGDNAVPMQHNNRPTQPLK                                           |
| 46. glyceraldehyde-3-phosphate dehydrogenase (GAPDH) | 7  | VVDLMAHMASK<br>LVINGNPITIFQER<br>LISWYDNEFGYSNR<br>LVINGNPITIFQERDPSK<br>VIISAPSADAPMFVMGVNHEK<br>WGDAGAEEVVESTGVFTTMEK<br>RVIISAPSADAPMFVMGVNHEK                                                                                        |
